# Supplementary material for: P2X7 Receptor Suppression Preserves Blood-Brain Barrier through Inhibiting RhoA Activation after Experimental Intracerebral Hemorrhage in Rats
Source: PubMed Central journal article supplement (PMC4793194; doi:10.1038/srep23286), 2016-03-16
Supplement: srep23286-s1.pdf [file srep23286-s1.pdf]

**P2X7 Receptor Suppression Preserves Blood-Brain Barrier  
through Inhibiting RhoA Activation after Experimental  
Intracerebral Hemorrhage in Rats**

Hengli Zhao<sup>1</sup>, Xuan Zhang<sup>1</sup>, Zhiqiang Dai<sup>1</sup>, Yang Feng<sup>1</sup>, Qiang Li<sup>1</sup>,

John H. Zhang<sup>2</sup>, Xin Liu<sup>1</sup>, Yujie Chen<sup>1, \*</sup>, Hua Feng<sup>1, \*</sup>

1 Department of Neurosurgery, Southwest Hospital, Third Military Medical University, Chongqing, China;

2 Department of Anesthesiology, Neurosurgery and Physiology, Loma Linda University, California, USA.

\* Corresponding author:

**Hua Feng, MD, PhD**

Department of Neurosurgery, Southwest Hospital, Third Military Medical University. 29 Gaotanyan Street, Shapingba District, Chongqing, 400038, China.

E-mail: [fenghua8888@vip.163.com](mailto:fenghua8888@vip.163.com)

Phone: (86)023-68754153, Fax: (86)023-68763954

and

**Yujie Chen, MD, PhD**

Department of Neurosurgery, Southwest Hospital, Third Military Medical University, Chongqing, China. 29 Gaotanyan Street, Shapingba District,

Chongqing, 400038, China.

E-mail: [yujiechen6886@foxmail.com](mailto:yujiechen6886@foxmail.com)

Phone: (86)023-68765265, Fax: (86)023-68765265

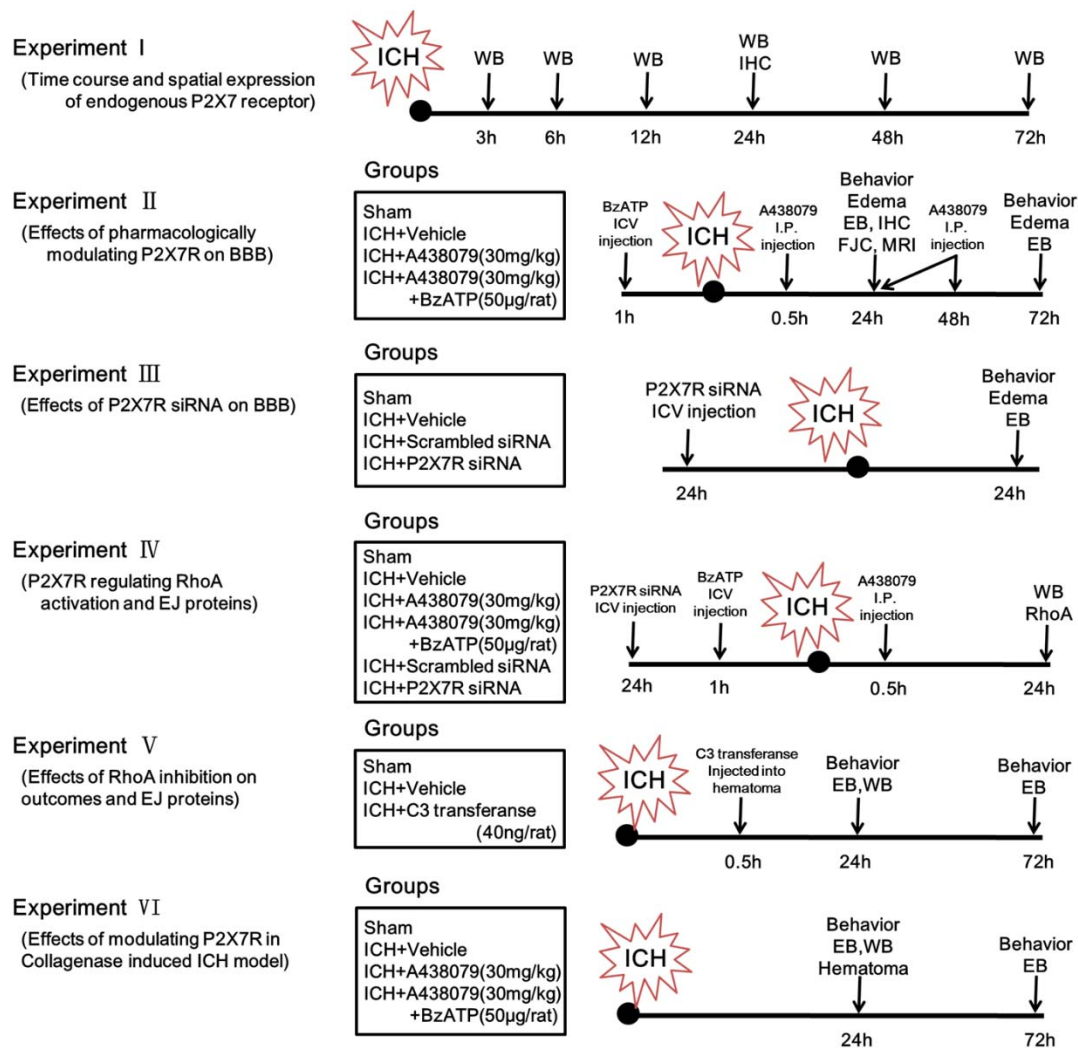

**Supplemental Figure 1.** Experimental design and animal groups' classification.

ICH: Intracerebral hemorrhage; BBB: Blood brain barrier; P2X7: P2X7 receptor;

EJ: endothelial junction; WB: Western blot; EB: Evans blue extravasation and

fluorescence; FJC: Fluoro-Jade C staining; MRI: Magnetic Resonance Imaging;

IHC: immunohistochemistry; ICV: intracerebralventricular; I.P.:

intraperitoneal; Hematoma: Hematoma volume.
